# Supplementary material for: Inhibition of the MAPK/c-Jun-EGR1 Pathway Decreases Photoreceptor Cell Death in the rd1 Mouse Model for Inherited Retinal Degeneration
Source: MDPI journal article supplement (doi:10.3390/ijms232314600), 2022-11-23
Supplement: s1 [file s1]

## Supplementary data and figures

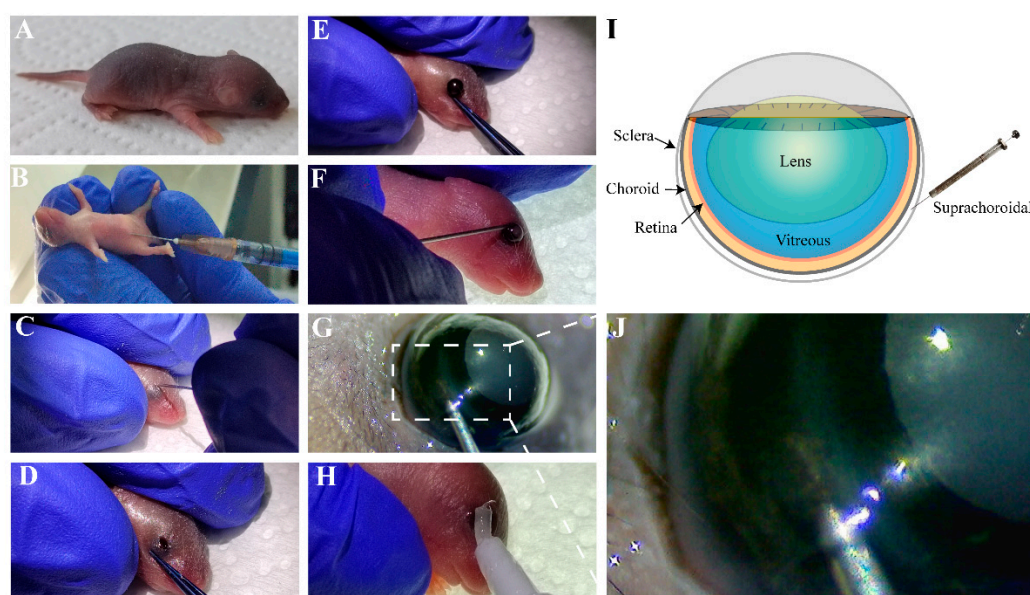

**Figure S1.** Suprachoroidal injection of vector in mice. Suprachoroidal injection of AAV vector in mice. (A) Mice at postnatal day 5. (B) Ketamine administration (100 mg/kg) for intraperitoneal anesthesia. (C-E) Use of a 1.5 mm incision of the eyelid with a 1 ml syringe needle for eyelid separation, to expose the eyeball. (F, G) A 34G Hamilton syringe was used for suprachoroidal injection of 2  $\mu$ l AAV virus vector (AAV9-EGR1-GFP  $1.84 \times 10^{10}$  vg/ml, AAV9-EGR1-RNAi  $1.57 \times 10^9$  vg/ml). (H) The eyeball is pushed back and antibiotic eye ointment is applied. (I) Diagram illustrating suprachoroidal injection. (J) magnified view of needle inserted into the eye ball.

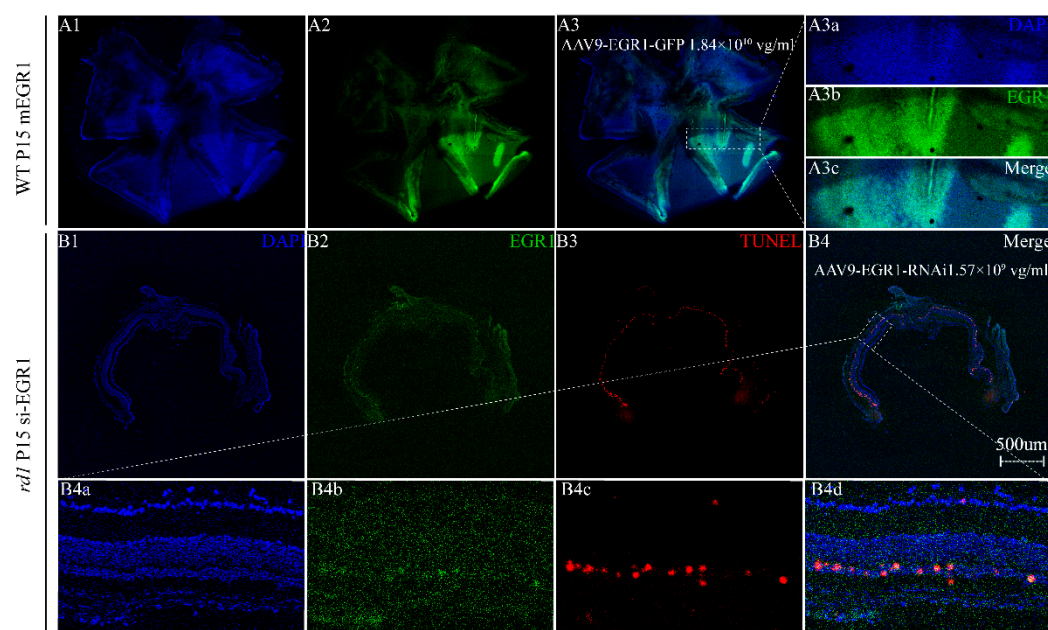

**Figure S2.** Expression of GFP in the retina after suprachoroidal injection of AAV9- EGR1-GFP. Wild-type (WT) and *rd1* mice were given a suprachoroidal injection of AAV9-EGR1-GFP  $1.84 \times 10^{10}$  viral genomes (vg) / ml or AAV9-EGR1-RNAi  $1.57 \times 10^9$  vg / ml. After 10 days, retinal flat mounts or ocular sections were examined by fluorescence microscopy. (A1-A3)

10 days after injection of AAV9-EGR1-GFP, retinal flat mounts (scale bar = 500µm) showed a few focal areas of hyperfluorescence around the injection site, but nothing above background elsewhere in the retina or RPE. An ocular section near the injection site (Merge, A3c) was examined for GFP fluorescence (green, A3b) and nuclei were counterstained with DAPI (blue, A3a, scale bar=500µm). An ocular section through the center of the cornea showed GFP fluorescence in photoreceptors (B1-B4, scale bar=500µm). The section (B4d, Merge) was immunohistochemically stained with GFP (green, B4b) and immunohistochemically stained for TUNEL (red, B4c), and nuclei were counterstained with DAPI (blue, B4a), which showed strong expression of GFP in photoreceptor outer segments and nuclei.

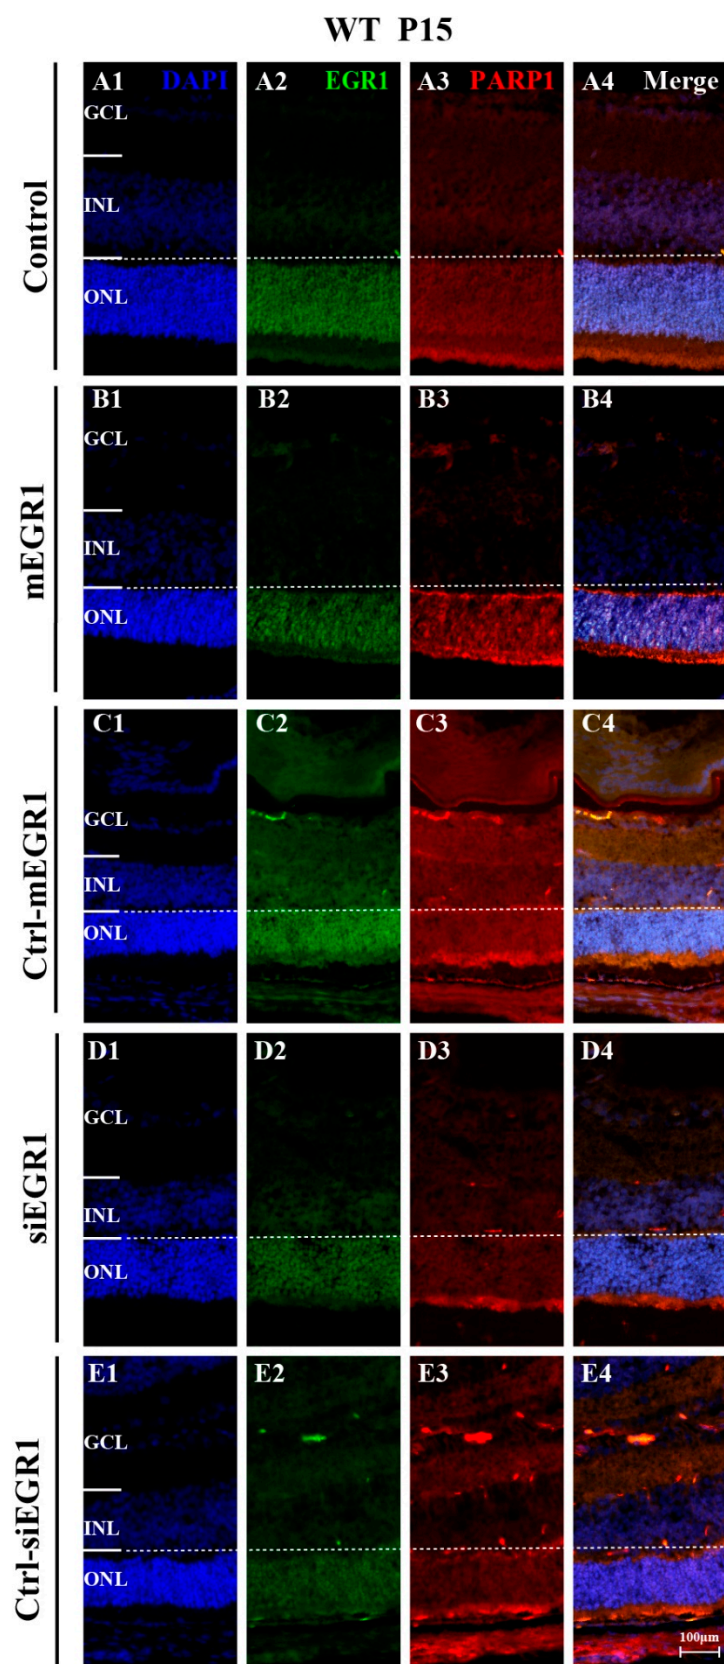

**Figure S3.** EGR1 and PARP1 expression are low in wild-type retina. At P5, wild-type (WT) mice were given a single suprachoroidal injection of an AAV carrying constructs targeting EGR1. The expression of EGR1 (green) and PARP1 (red) was examined at P15 in WT retina using immunofluorescence staining. Nuclei were counterstained with DAPI (blue). (A-E) In WT retina there were only few cells positive for EGR1 and PARP1 expression. (A1-A4) Untreated, control

*rdl* retina. (B1-B4) Retina after treatment with AAV9-EGR1-GFP ( $7.68 \times 10^{10}$  vg/ml). (C1-C4) Retina after treatment with a control construct for EGR1. (D1-D4) *rdl* retina treated with siRNA construct AAV9-EGR1-RNAi ( $3.676 \times 10^9$  vg/ml). (E1-E4) Retina after treatment with a control construct for siRNA EGR1. The images shown are representative for observations on at least six different specimens for each genotype. ONL = outer nuclear layer, INL = inner nuclear layer, GCL = ganglion cell layer. Scale bar = 100  $\mu$ m.

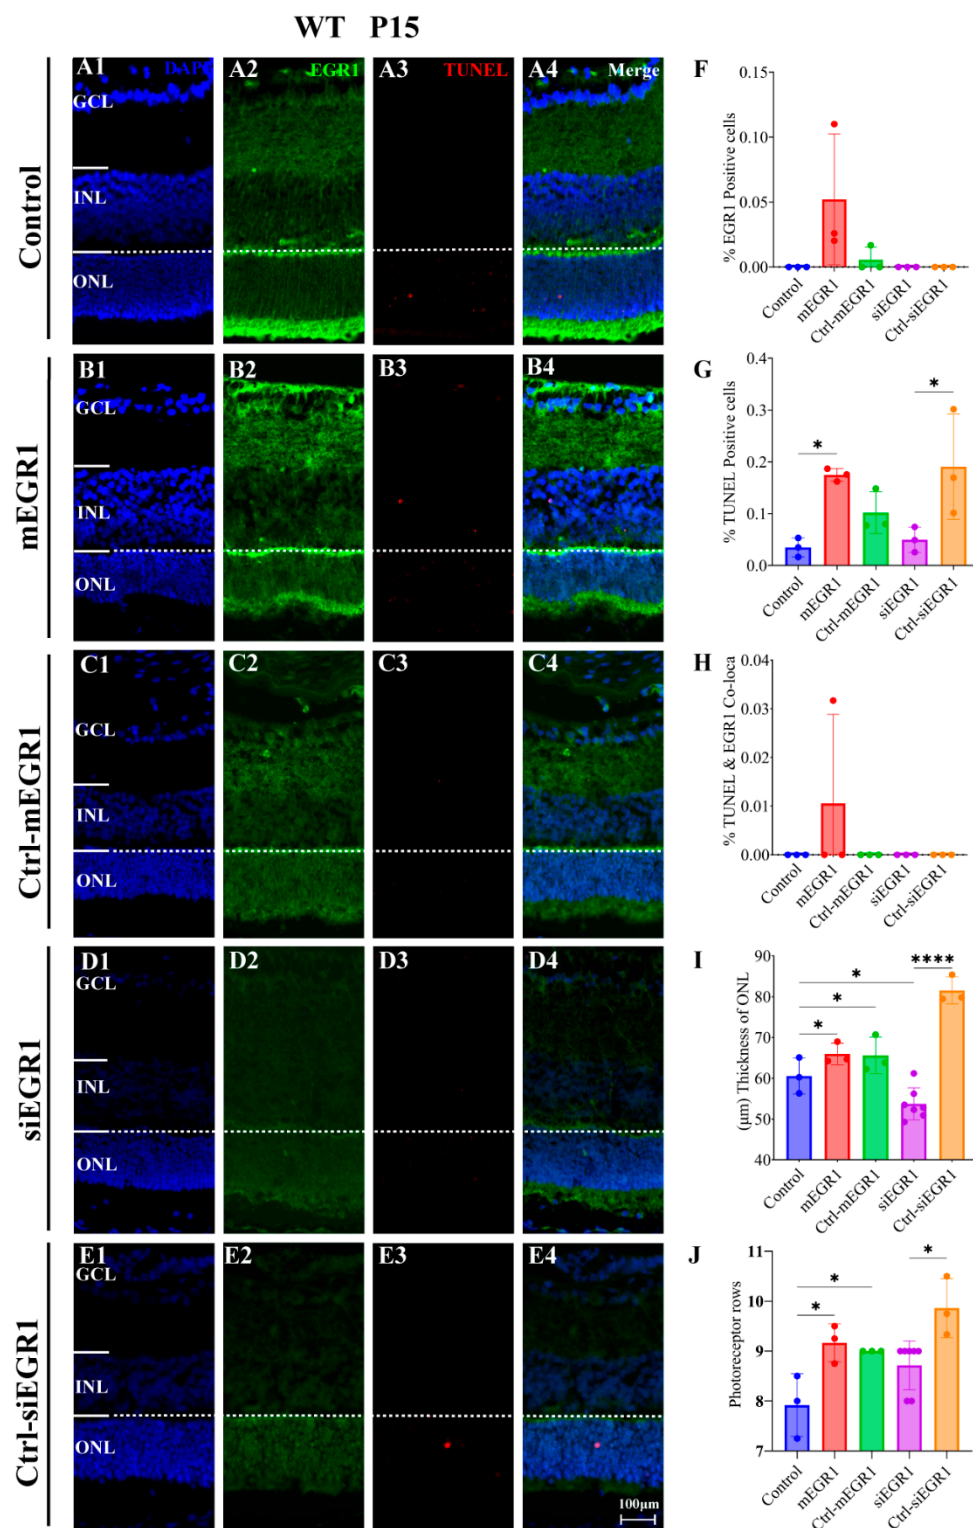



Expression of EGR1 (green) and TUNEL (red) in the retina at P15 WT mice was examined using immunofluorescence staining and TUNEL assay. Nuclei were counterstained with DAPI (blue). (A-E) In WT retina overall there were only few EGR1 or TUNEL positive cells. (A1-A4) Untreated, control *rd1* retina. (B1-B4) Retina after treatment with AAV9-EGR1-GFP ( $7.68 \times 10^{10}$  vg/ml). (C1-C4) Retina after treatment with a control construct for EGR1. (D1-D4) *rd1* retina treated with siRNA construct AAV9-EGR1-RNAi ( $3.676 \times 10^9$  vg/ml). (E1-E4) Retina after treatment with a control construct for siRNA EGR1. (F-J) Quantification of (F) percentage of EGR1-positive cells in WT outer nuclear layer (ONL), (G) percentage of TUNEL-positive, dying cells in WT outer nuclear layer (ONL), (H) percentage of ONL cells displaying colocalization of TUNEL and EGR1, (I) thickness of ONL in  $\mu\text{m}$ , and (J) photoreceptor row counts. The images shown are representative for observations on at least three different specimens for each genotype. Error bars represent SD. ONL = outer nuclear layer, INL = inner nuclear layer, GCL = ganglion cell layer. Scale bar = 100  $\mu\text{m}$ . \* =  $p < 0.05$ ; \*\*\*\* =  $p < 0.0001$ .

**Table S1. Dual Luminescence Assay**

|           |                      |             |             |           |
|-----------|----------------------|-------------|-------------|-----------|
| SEAP      | Ctrl-mEGR1+PAPR1/WT  | 12576.12601 | 11608.75306 | 10837.946 |
|           | Ctrl-mEGR1+PAPR1/MUT | 7584.433455 | 9238.767989 | 10093.421 |
|           | mEGR1+PAPR1/WT       | 12576.12601 | 11608.75306 | 11869.991 |
|           | mEGR1+PAPR1/MUT      | 11931.17986 | 15155.81806 | 15386.365 |
| GLUC      | Ctrl-mEGR1+PAPR1/WT  | 11522.90736 | 11023.16937 | 10284.429 |
|           | Ctrl-mEGR1+PAPR1/MUT | 7452.590527 | 7593.819383 | 8035.6154 |
|           | mEGR1+PAPR1/WT       | 6020.855219 | 6024.477112 | 7985.3705 |
|           | mEGR1+PAPR1/MUT      | 10508.9542  | 12804.83897 | 12956.938 |
| Gluc/SEAP | Ctrl-mEGR1+PAPR1/WT  | 0.916252537 | 0.94955671  | 0.9489279 |
|           | Ctrl-mEGR1+PAPR1/MUT | 0.982616641 | 0.821951519 | 0.7961241 |
|           | mEGR1+PAPR1/WT       | 0.478752774 | 0.518959882 | 0.672736  |
|           | mEGR1+PAPR1/MUT      | 0.880797568 | 0.844879433 | 0.8421052 |

| Ctrl-mEGR1<br>+PAPR1<br>/WT | mEGR1<br>+PAPR1<br>/WT | Ctrl-mEGR1<br>+PAPR1<br>/MUT | mEGR1<br>+PAPR1<br>/MUT |
|-----------------------------|------------------------|------------------------------|-------------------------|
| 0.916252537                 | 0.478752774            | 0.982616641                  | 0.880797568             |
| 0.94955671                  | 0.518959882            | 0.821951519                  | 0.844879433             |
| 0.948927904                 | 0.672736001            | 0.796124061                  | 0.842105198             |
